# Supplementary material
Source: PubMed Central journal article supplement (PMC2613743)
Supplement: pp.108.130732_1.pdf [file pp.108.130732_1.pdf]

**SUPPLEMENTAL MATERIAL**

**SUPPLEMENTAL FIGURES**

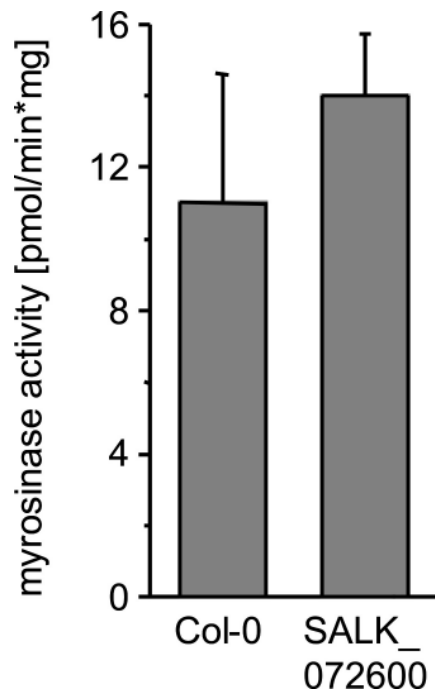

**Fig. S1: Myrosinase activity in Col-0 and SALK\_072600 rosette leaves.** Myrosinase activity determined in rosette leaf extracts using the glucose release assay and allylglucosinolate as substrate was expressed as the amount (pmol) of glucose formed per minute and mg total protein. Means  $\pm$  SD (n=3).

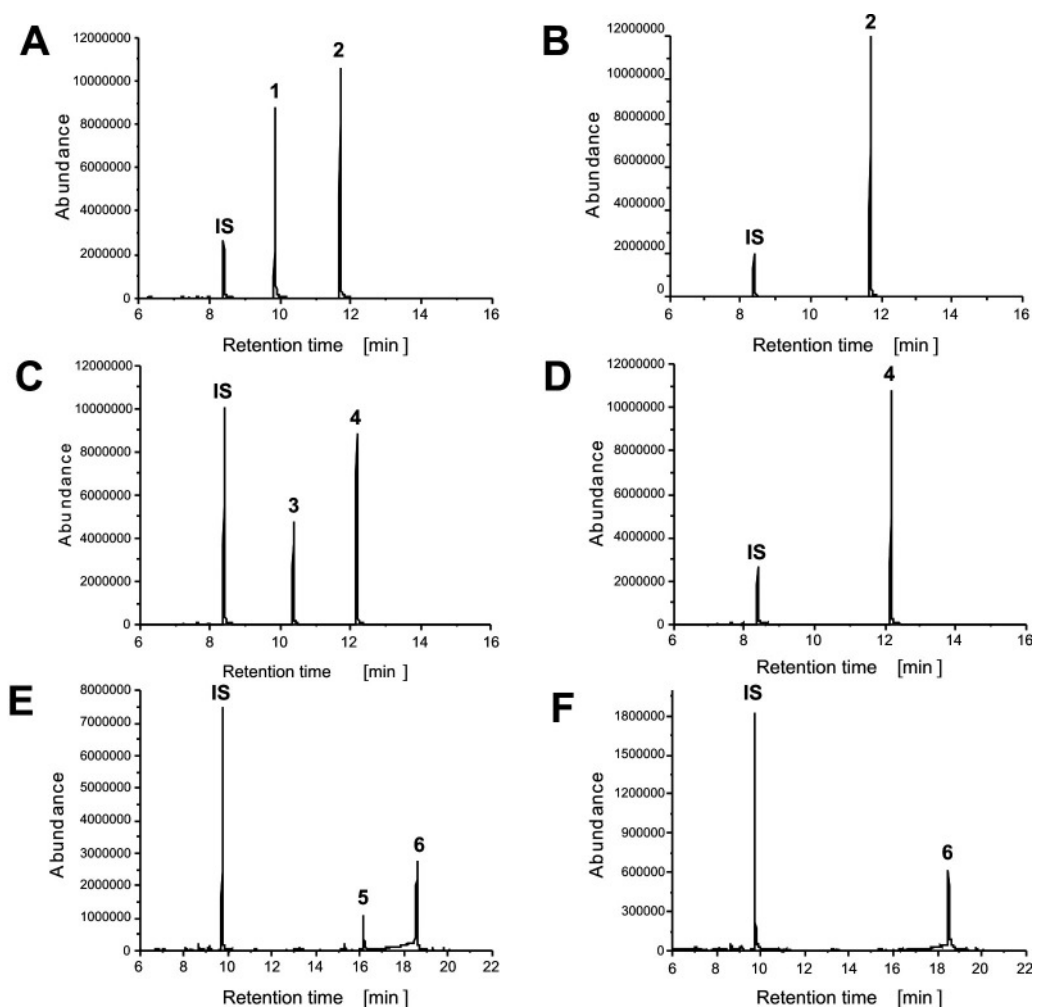

**Fig. S2: Effects of AtNSP1 on glucosinolate hydrolysis *in vitro*.** Hydrolysis products in enzyme assays with benzylglucosinolate (A-B), 4-methylthiobutylglucosinolate (C-D), and 4-methylsulfinylbutylglucosinolate (E-F). Assays were carried out with (A, C, E) and without (B, D, F) purified AtNSP1 in 50 mM Mes buffer, pH 6.0, containing 1 mM (benzyl-, 4-methylthiobutylglucosinolate) or 3 mM (4-methylsulfinylbutylglucosinolate) substrate for the myrosinase reaction. Depicted are GC-MS chromatograms (total ion current traces) of dichloromethane extracts. 1, benzyl-CN (phenylacetonitrile); 2, benzyl-ITC (1-(isothiocyanatomethyl)benzene); 3, 4-methylthiobutyl-CN (5-methylsulfanyl-pentanenitrile); 4, 4-methylthiobutyl-ITC (1-isothiocyanato-4-methylsulfanyl-butane); 5, 4-methylsulfinylbutyl-CN (5-methanesulfinyl-pentanenitrile); 6, 4-methylsulfinylbutyl-ITC (1-isothiocyanato-4-methanesulfinyl-butane); CN, simple nitrile; ITC, isothiocyanate; IS, internal standard.

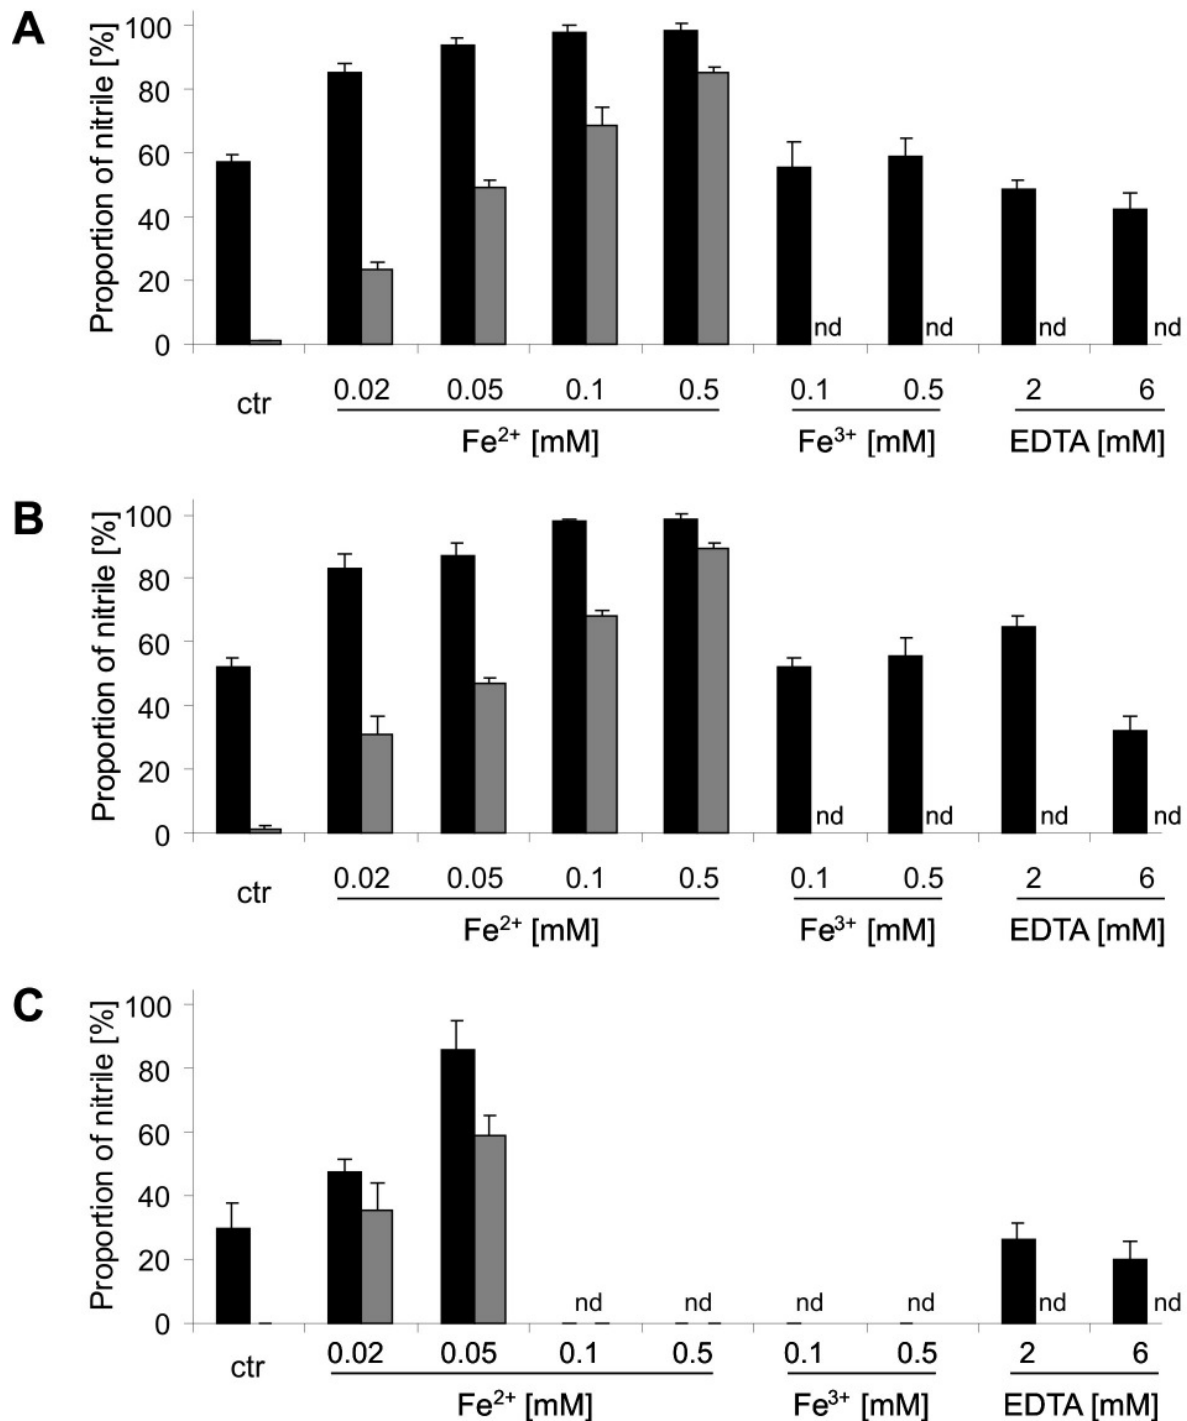

**Fig. S3: Effects of iron salts and EDTA on AtNSP1 activity with various substrates *in vitro*.** Simple nitrile formation in assays with purified AtNSP1 and myrosinase (black bars) and in control assays with myrosinase alone (grey bars) was measured in 50 mM Mes, pH 6.0, containing 1 mM benzylglucosinolate (A), 1 mM 4-methylthiobutylglucosinolate (B), or 3 mM 4-methylsulfinylbutylglucosinolate (C). Fe<sup>2+</sup> and Fe<sup>3+</sup> were added as (NH<sub>4</sub>)<sub>2</sub>[Fe(SO<sub>4</sub>)<sub>2</sub>] and FeCl<sub>3</sub>, respectively. Means ± SD of results obtained in three independent experiments. ctr, control (no iron added); nd, not determined

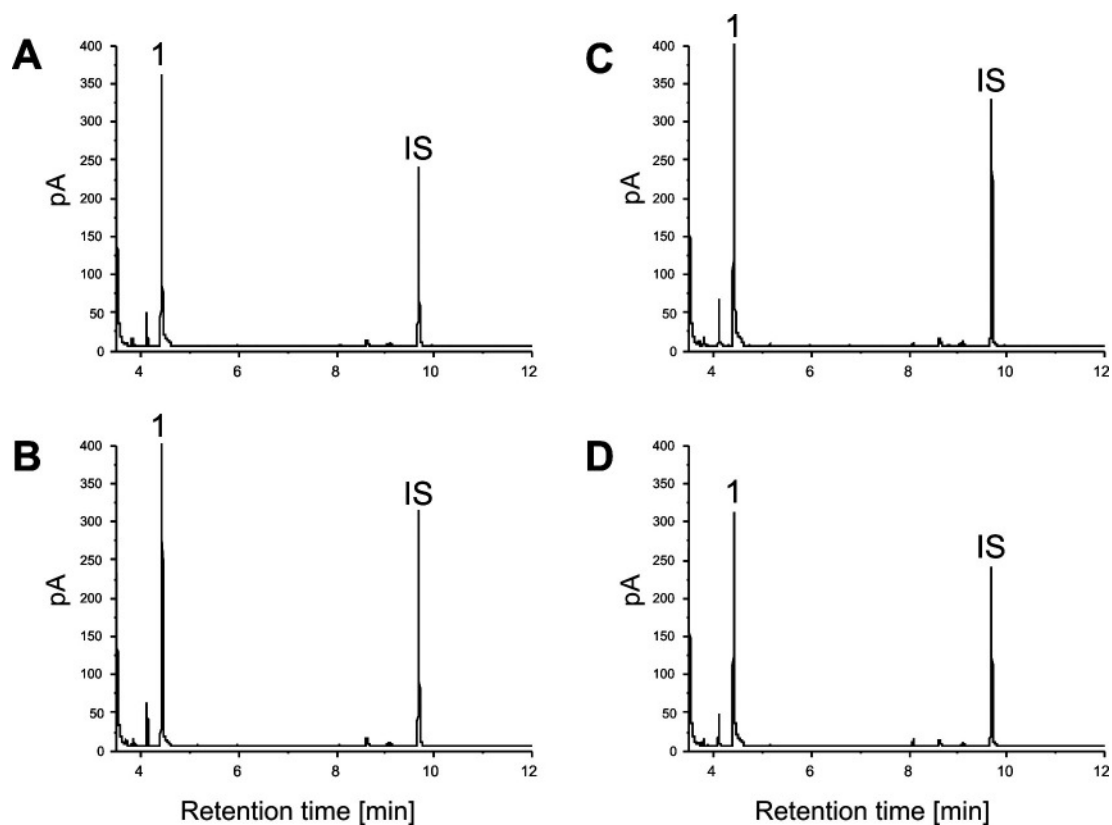

**Fig. S4: Effects of AtNSP2 through 5 on allylglucosinolate hydrolysis *in vitro*.** Hydrolysis products in enzyme assays with AtNSP2 (A), AtNSP3 (B), AtNSP4 (C), and AtNSP5 (D). Assays were carried out with crude extracts of bacteria harbouring the respective expression constructs in 50 mM Mes buffer, pH 6.0, containing 2 mM allylglucosinolate as substrate for the myrosinase reaction. Depicted are GC-FID chromatograms of dichloromethane extracts. 1, simple nitrile formed from allylglucosinolate; IS, internal standard

## SUPPLEMENTAL TABLES

**Table S1:** Publicly available mutant lines of candidate genes screened in this study.

| <b>gene locus</b> | <b>ABRC/NASC stock numbers</b>                           |
|-------------------|----------------------------------------------------------|
| At3g16400         | SALK_072600                                              |
| At2g33070         | SALK_004170<br>SALK_004179<br>SALK_057194                |
| At3g16390         | SALK_006880<br>SALK_016880<br>SALK_108690                |
| At3g16410         | CS91216<br>CS91230<br>CS92268<br>CS93227<br>CS93855      |
| At5g48180         | SALK_121606                                              |
| At3g07720         | SALK_020735<br>SALK_109542<br>SALK_123411<br>SALK_137517 |

**Table S2:** Glucosinolate content in Col-0 and SALK\_072600 rosette leaves. Glucosinolate content (nmol/mg fresh weight) was determined by HPLC after conversion of the glucosinolates to their desulfo-derivatives. Numbers 1 to 5 indicate biological replicates. P shows the significance using a one-tailed t-test. n.s., no significant difference between Col-0 and SALK\_072600. 3MSOP, 3-methylsulfinylpropyl-; 4MTB, 4-methylthiobutyl-; 4MSOB, 4-methylsulfinylbutyl-; 7MSOH, 7-methylsulfinylheptyl-; I3M, indol-3-ylmethyl-; 4MOI3M, 4-methoxy-indol-3-ylmethyl-; 1MOI3M, 1-methoxy-indol-3-ylmethyl-; n.d. = not detected.

| <b>Glucosinolate</b> | <b>P</b> | <b>Col-0</b> |          |             | <b>SALK_072600</b> |          |          |             |
|----------------------|----------|--------------|----------|-------------|--------------------|----------|----------|-------------|
|                      |          | <b>1</b>     | <b>2</b> | <b>mean</b> | <b>3</b>           | <b>4</b> | <b>5</b> | <b>mean</b> |
| 3MSOP                | n.s.     | 0.43         | 0.32     | 0.37        | 0.38               | 0.38     | 0.33     | 0.36        |
| 4MTB                 | n.s.     | 0.28         | 0.44     | 0.36        | 0.50               | 0.27     | 0.39     | 0.39        |
| 4MSOB                | n.s.     | 2.99         | 2.22     | 2.60        | 2.79               | 2.80     | 2.45     | 2.68        |
| 7MSOH                | n.s.     | 0.04         | 0.03     | 0.04        | 0.03               | 0.03     | 0.02     | 0.03        |
| I3M                  | n.s.     | 0.45         | 0.41     | 0.43        | 0.43               | 0.43     | 0.39     | 0.42        |
| 4MOI3M               | n.s.     | 0.09         | 0.11     | 0.10        | 0.08               | 0.08     | 0.09     | 0.08        |
| 1MOI3M               |          | n.d.         | n.d.     | n.d.        | 0.01               | 0.01     | 0.01     | 0.01        |
| total                | n.s.     | 4.28         | 3.53     | 3.90        | 4.22               | 3.99     | 3.67     | 3.96        |

**Table S3:** Temperature programs used for GC-MS and GC-FID analyses.

| <b>Program no.</b> | <b>Temperature gradient</b>                                                                        | <b>Application</b>                                                                                       |
|--------------------|----------------------------------------------------------------------------------------------------|----------------------------------------------------------------------------------------------------------|
| I                  | 35°C for 3 min, 18°C min <sup>-1</sup> to 280°C, 30°C min <sup>-1</sup> to 310°C, 3 min final hold | Analysis of <i>in vitro</i> assays with allyl- and benzylglucosinolate                                   |
| II                 | 35°C for 3 min, 12°C min <sup>-1</sup> to 280°C, 30°C min <sup>-1</sup> to 310°C, 3 min final hold | Analysis of <i>in vitro</i> assays with 4-methylthiobutyl- and 4-methylsulfinylbutylglucosinolate        |
| III                | 35°C for 3 min, 12°C min <sup>-1</sup> to 280°C, 30°C min <sup>-1</sup> to 300°C, 3 min final hold | Analysis of hydrolysis products in leaf homogenates with or without addition of exogenous glucosinolates |

**Table S4:** Temperature programs used for PCR.

| <b>Program no.</b> | <b>Temperature gradient</b>                                                                                       | <b>Application</b>                  |
|--------------------|-------------------------------------------------------------------------------------------------------------------|-------------------------------------|
| I                  | 94°C for 2 min; 34 cycles of 94°C for 45 s, 57°C for 45 s, 72°C for 60 s; final incubation at 72°C for 10 min     | Verification of T-DNA insertion     |
| II                 | 94°C for 2 min; 33 cycles of 94°C for 30 s, 63°C for 30 s, and 72°C for 60 s; final incubation at 72°C for 10 min | Expression analysis by RT-PCR       |
| III                | 95°C for 3 min; 35 cycles of 95°C for 45 s, 60°C for 60 s, 72°C for 120 s; final incubation at 72°C for 10 min    | Generation of expression constructs |

**Table S5:** Primers for expression analysis by RT-PCR.

| <b>gene locus</b>          | <b>forward primer</b><br>(5'- ... -3') | <b>reverse primer</b><br>(5'- ... -3') |
|----------------------------|----------------------------------------|----------------------------------------|
| <i>At3g16400 (AtNSP1)</i>  | GCTACGGCACGACTCAATACAC                 | CCCACACACACACACACACATTC                |
| <i>At1g54040 (ESP)</i>     | GCAGCCATGGCTCCGAC                      | TCATCTAGATTAAGCTGAATTGACCGCATAG        |
| <i>At1g49240 (actin 8)</i> | AGCTGTTCTATCACTTTACGCCAG               | GATCCCTGCAGCTTCCATCC                   |

**Table S6:** Primers for the generation of expression constructs. Lower case letters indicate primer overhangs required for USER cloning.

| <b>gene locus</b>         | <b>forward primer</b><br>(5'- ... -3') | <b>reverse primer</b><br>(5'- ... -3') |
|---------------------------|----------------------------------------|----------------------------------------|
| <i>At3g16400 (AtNSP1)</i> | ggcttaauATGGCCCAAAGCTAGAAGC            | ggtttaauTTAGGCAGAGTCAATCCCGTAA         |
| <i>At2g33070 (AtNSP2)</i> | ggcttaauATGGTGCAAAAGGTGGAAGC           | ggtttaauTTATGCAGAGTCAACTCCATAAAAG      |
| <i>At3g16390 (AtNSP3)</i> | ggcttaauATGGCCCAAAGCTAGTTGCACA         | ggtttaauTCAGACAGAGTCAATCCCGTAAAG       |
| <i>At3g16410 (AtNSP4)</i> | ggcttaauATGGCCCAAAGGTTGAAGCAC          | ggtttaauTTAGGCAGAGTCAATCCCGTAAAG       |
| <i>At5g48180 (AtNSP5)</i> | ggcttaauATGTGTCCGGTGGAGAAC             | ggtttaauTTAATTGACATTAAGATGAGAGAAC      |
| <i>At3g07720</i>          | ggcttaauATGGCAGCGACTCCTATGGA           | ggtttaauTCACTTGAGTAGAGTGTGGGAGTG       |
| <i>At1g54040 (ESP)</i>    | ggcttaauATGGCTCCGACTTTGAAAGGC          | ggtttaauTTAAGCTGAATTGACCGCATAGAAG      |
